# Supplementary material
Source: PubMed Central journal article supplement (PMC2604833)
Supplement: 90442.2008_1.pdf [file 90442.2008_1.pdf]

# Supplemental Fig 1

## Leelahavanichkul et al.

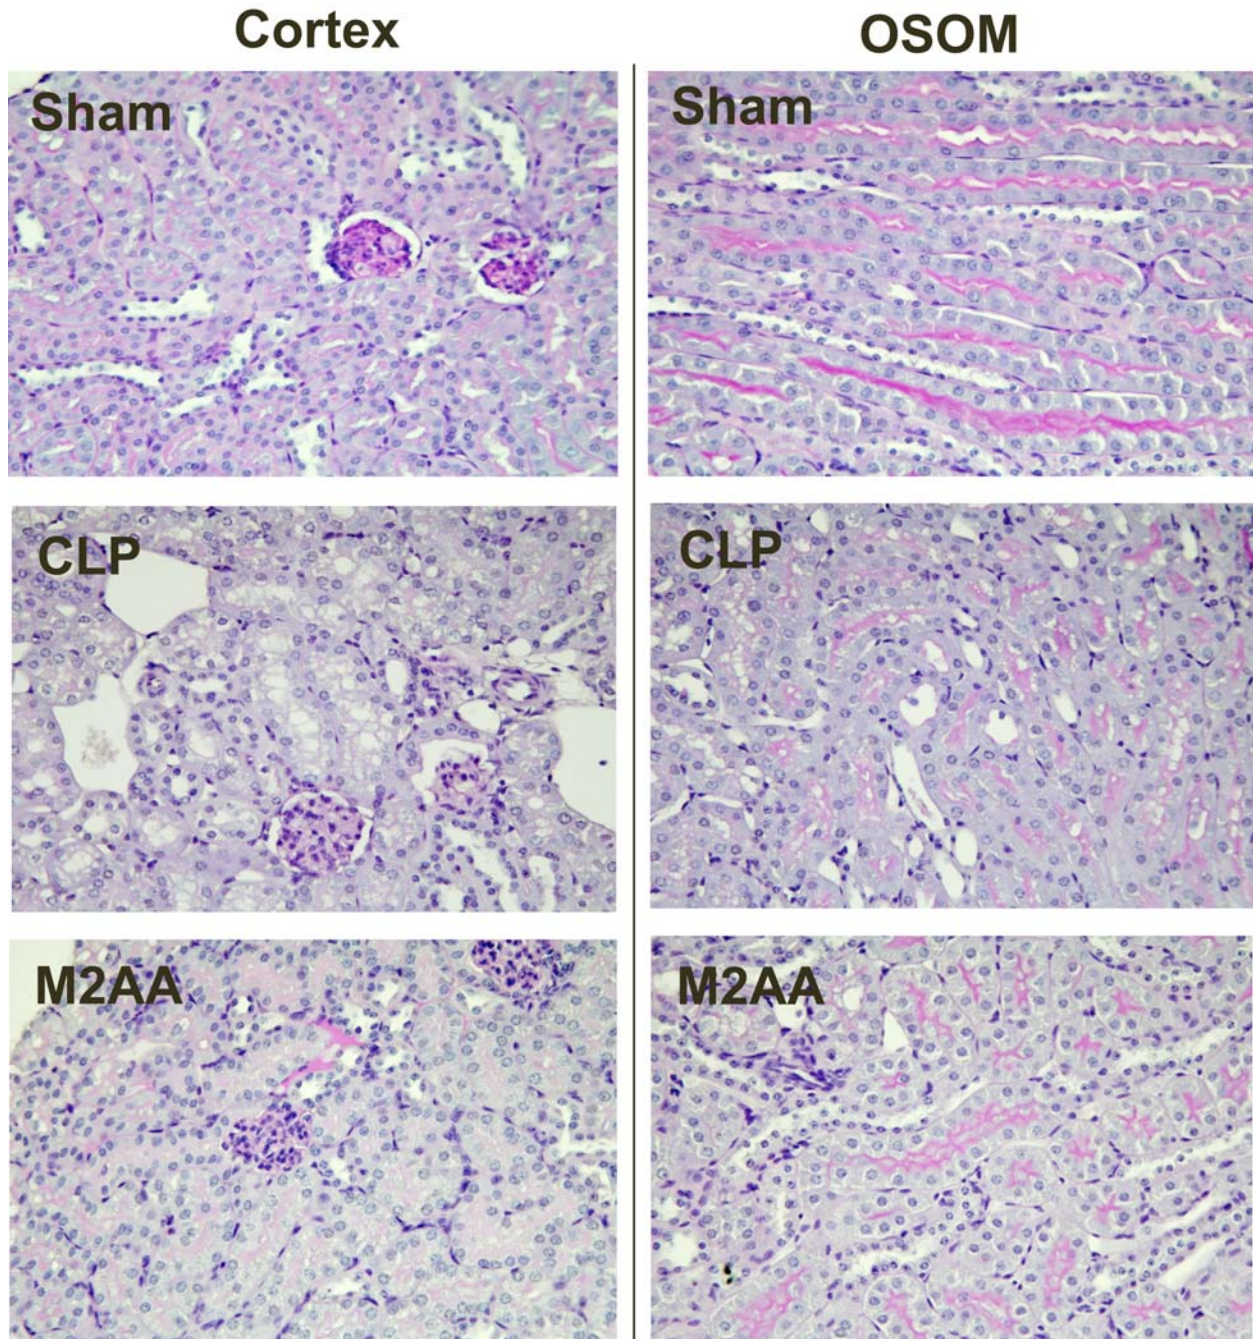

CLP-induced renal damage at 24 h is reduced by M2AA, by histology (PAS staining).
