# Supplementary material
Source: PubMed Central journal article supplement (PMC2604833)
Supplement: 90442.2008_2.pdf [file 90442.2008_2.pdf]

## Supplemental Fig 2 Leelahavanichkul et al.

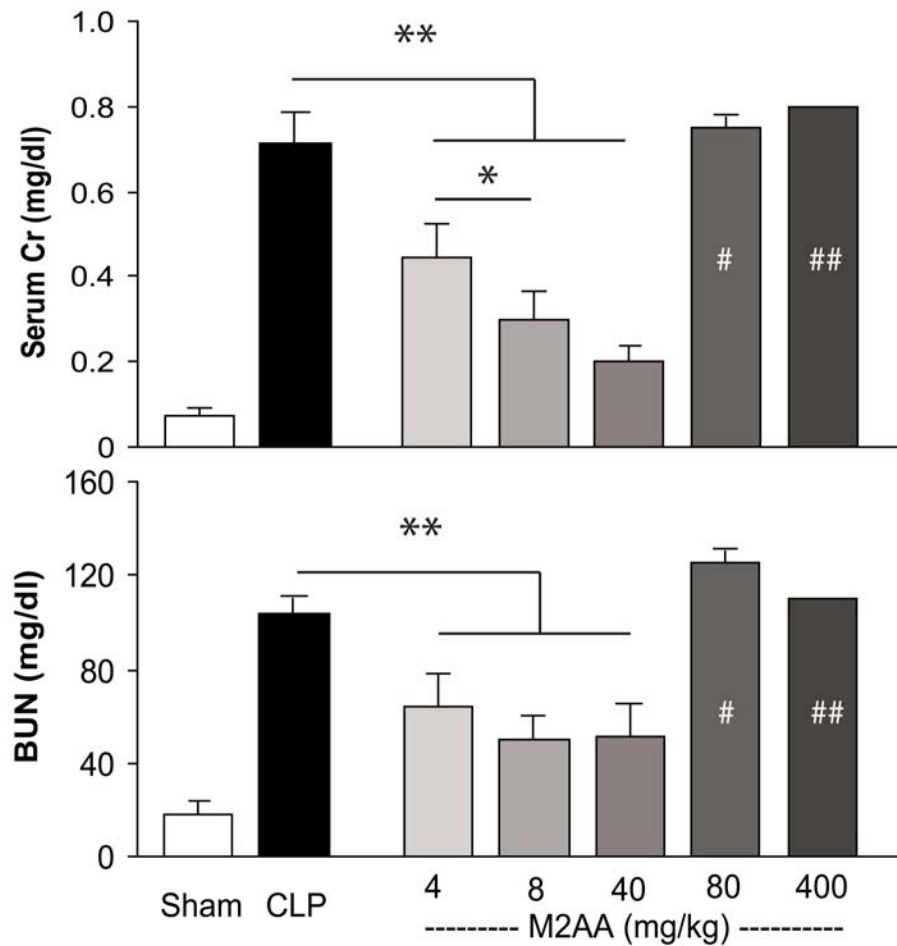

### **Effect of different doses of M2AA on sepsis-induced AKI**

Mice were injected (i.p.) with different doses of M2AA then subjected to CLP surgery. At 24 h BUN and serum creatinine (Scr) were measured. (N = 4-6 per group)

\*P<0.05, 4 vs. 8 mg/kg

\*\* P<0.05, CLP vs. CLP + M2AA

# N = 2 (4/6 mice died within 18h)

## N = 1 (5/6 mice died within 6 h)
