# Supplementary material
Source: PubMed Central journal article supplement (PMC2604833)
Supplement: 90442.2008_3.pdf [file 90442.2008_3.pdf]

## Supplemental Fig 3 Leelahavanichkul et al.

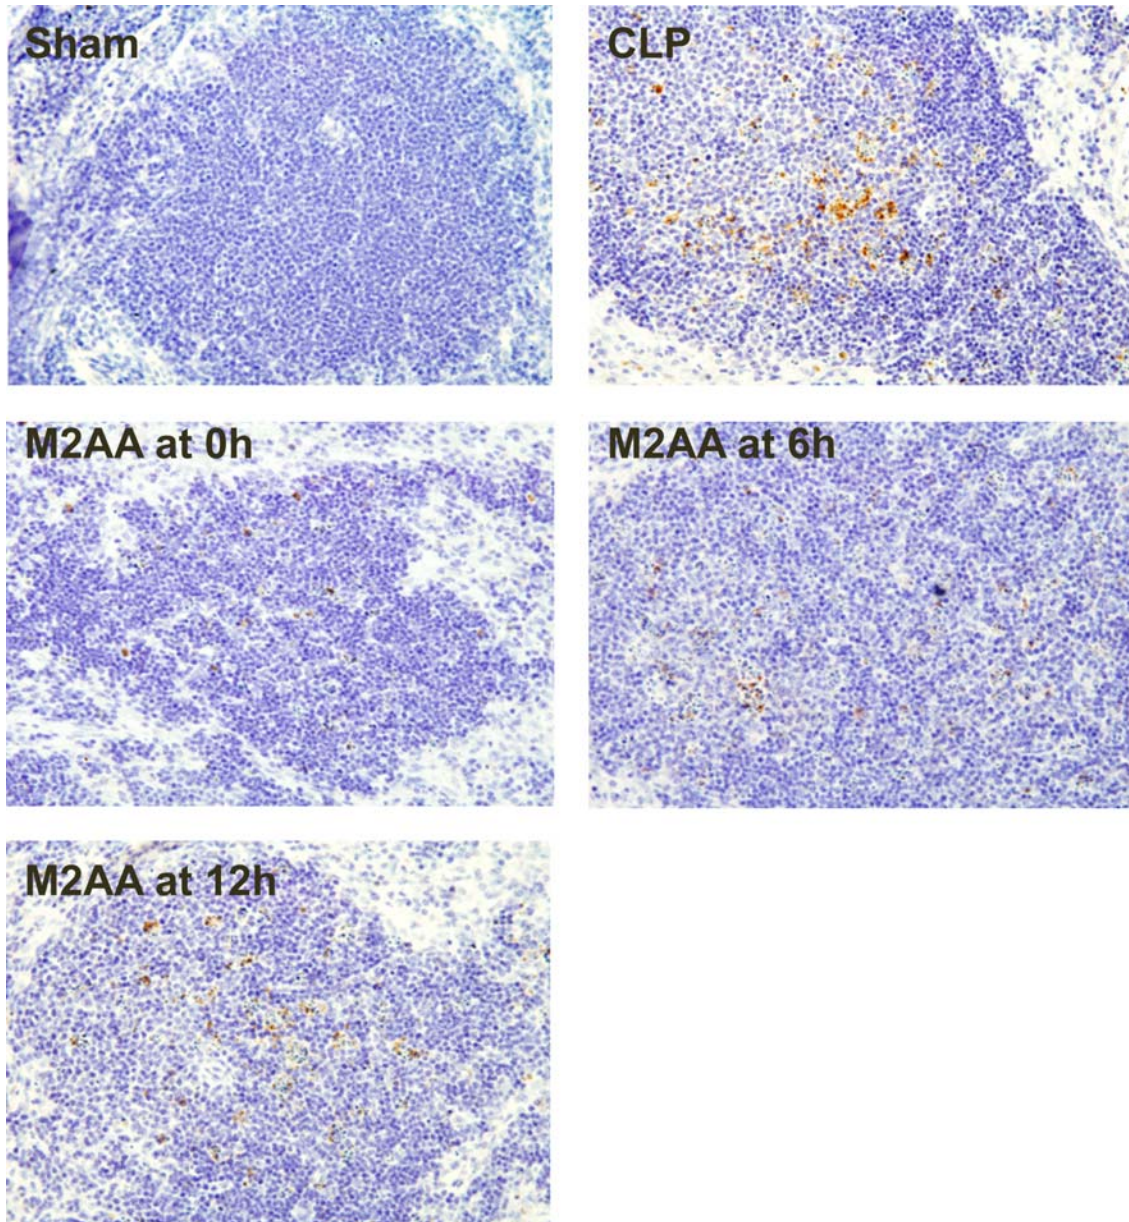

Effect of delaying M2AA treatment on splenic apoptosis, by active caspase 3 staining, 24h after CLP.
