# Supplementary material
Source: PubMed Central journal article supplement (PMC2604833)
Supplement: 90442.2008_4.pdf [file 90442.2008_4.pdf]

## Supplemental Fig 4 Leelahavanichkul et al.

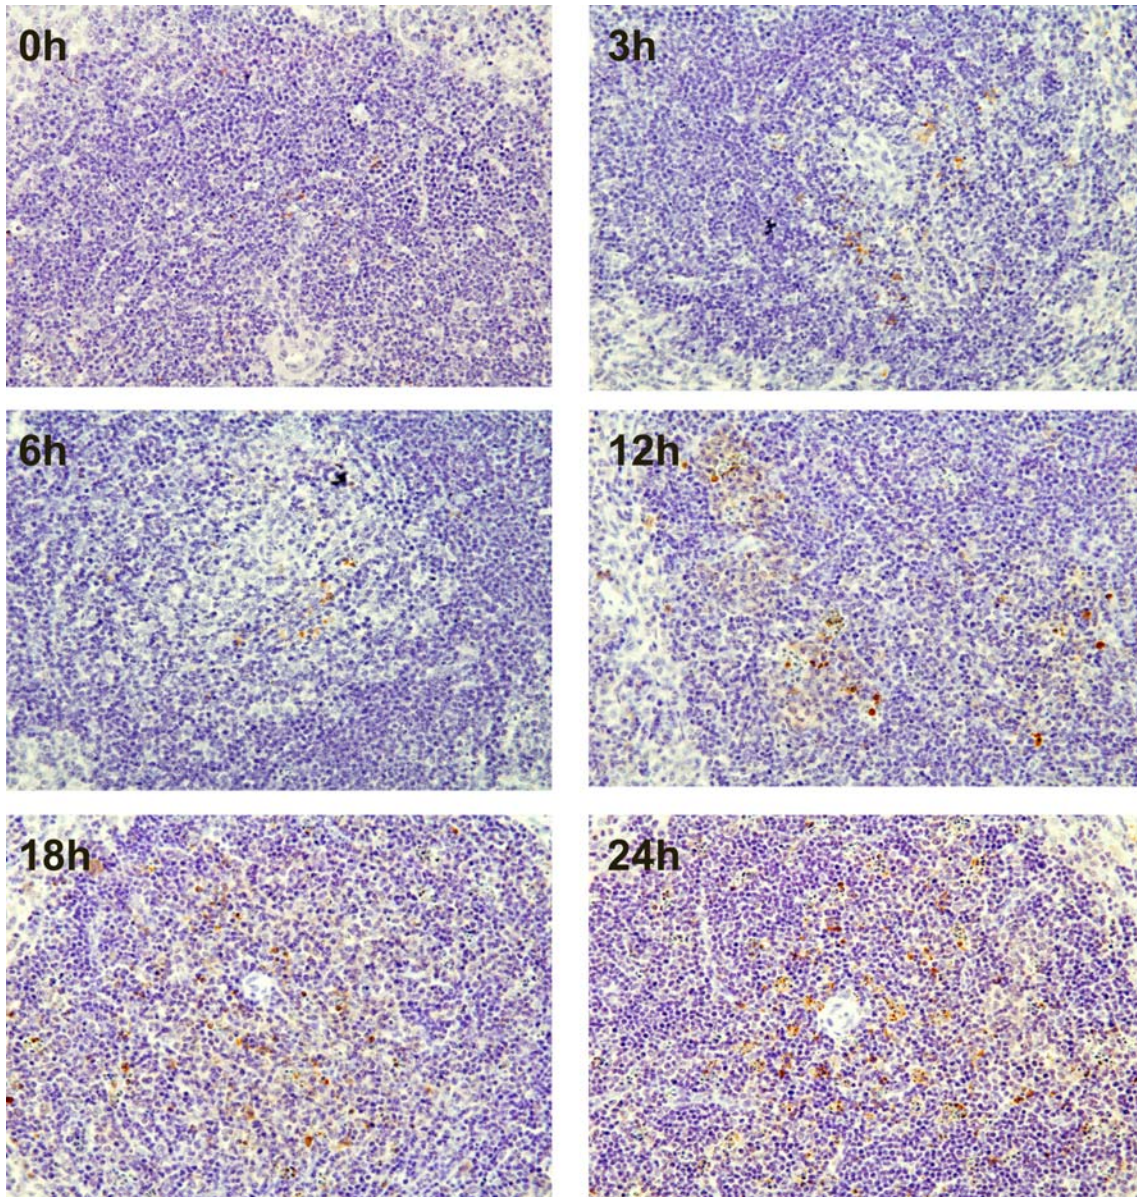

Time course of CLP-induced splenic apoptosis,  
by active caspase staining, white pulp
