# Supplementary material
Source: PubMed Central journal article supplement (PMC2604833)
Supplement: 90442.2008_5.pdf [file 90442.2008_5.pdf]

## Supplemental Fig 5 Leelahavanichkul et al.

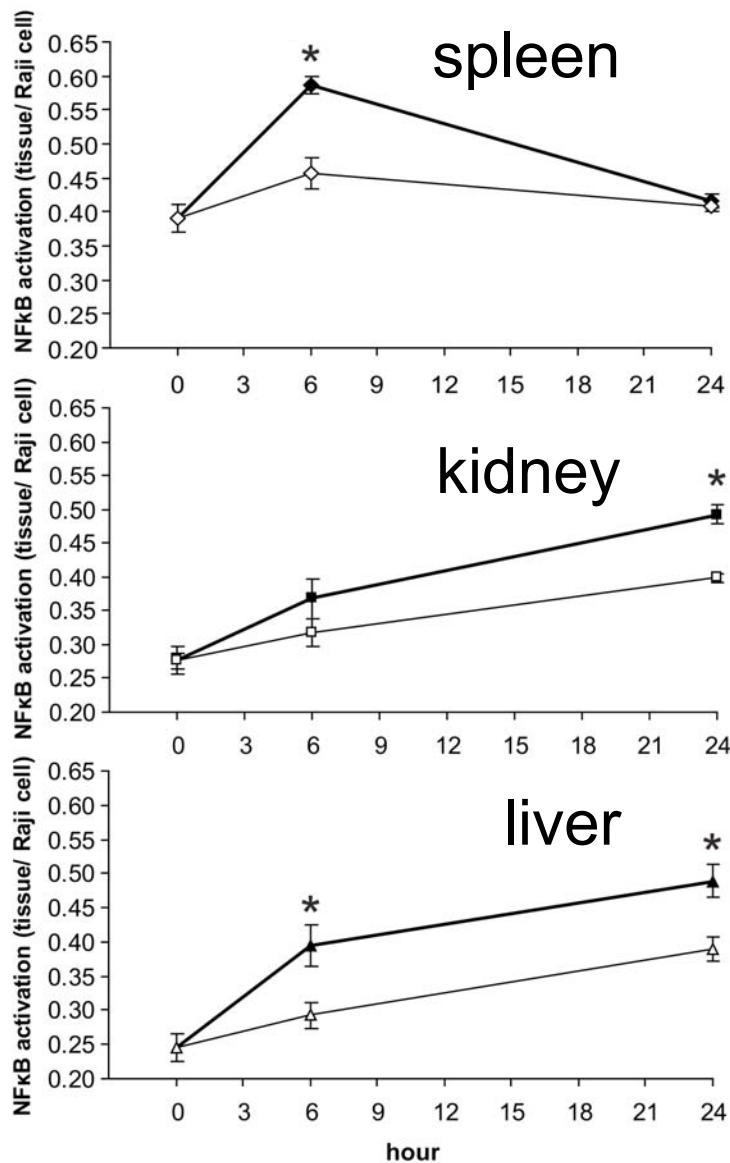

### Time course of NFκB activation during M2AA treatment

Mice were treated with vehicle (closed symbols) or 8 mg/kg (i.p.) M2AA (open symbols) prior to CLP surgery. Activated NF-κB p65 in spleen (top panel, diamonds), kidney (middle panel, squares), or liver (bottom panel, triangles) and in M2AA treatment in spleen was measured at indicated time points and normalized by Raji nuclear extract. N = 4-6 per group.

\* P<0.05 vs. control CLP in the same time point.
