# Supplementary material
Source: PubMed Central journal article supplement (PMC2604833)
Supplement: 90442.2008_6.pdf [file 90442.2008_6.pdf]

## Supplemental Fig 6 Leelahavanichkul et al.

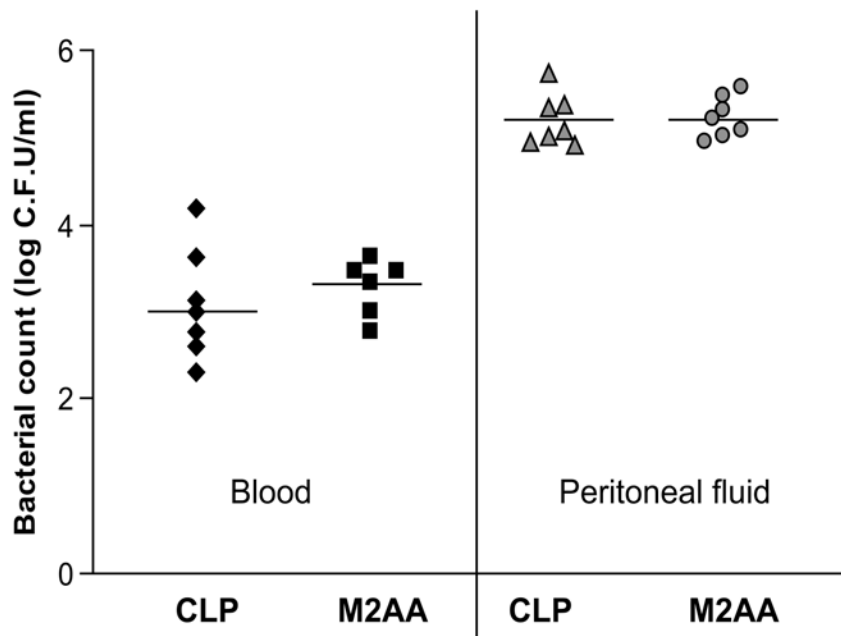

M2AA does not affect bacterial counts in blood  
Or peritoneal fluid 24h after CLP.
